# Supplementary material for: Insights Into Peptidyl-Prolyl Cis-Trans Isomerases From Clinically Important Protozoans: From Structure to Potential Biotechnological Applications
Source: Preprints.org preprint supplement (doi:10.20944/preprints202406.0718.v1), 2024-06-12
Supplement: Supplementary file 1 [file supplementary]

**Table S2. Comparison of PPlases among *G. intestinalis* isolates and human orthologues.**

| PPlasa                          | UniProt ID | <i>G. intestinalis</i><br>Isolate | Size                                 |                  | pI <sup>3</sup> | PPlase<br>Domain<br>(residues) | Additional<br>regions<br>(residues) | Human<br>orthologue |
|---------------------------------|------------|-----------------------------------|--------------------------------------|------------------|-----------------|--------------------------------|-------------------------------------|---------------------|
|                                 |            |                                   | AAs                                  | kDa <sup>2</sup> |                 |                                |                                     |                     |
| hCyP18 <sup>1</sup><br>(CYPA)   | P62937     |                                   | 165                                  | 18.01            | 7.68            | 7-163                          |                                     |                     |
| hCyP24 <sup>1</sup><br>(CYPB)   | P23284     |                                   | 216 <sup>3</sup><br>205 <sup>4</sup> | 23.74            | 9.42            | 47-204                         | SP (1-33)<br>ER (213-216)           |                     |
| GiCyP18                         | A8BC67     | WB                                | 168                                  | 18.04            | 8.42            | 10-166                         |                                     | hCyP18              |
| GiCyP18                         | C6LQJ1     | GS                                | 168                                  | 18.03            | 8.42            | 10-166                         |                                     | hCyP18              |
| GiCyP21                         | A8BJP8     | WB                                | 191                                  | 21.21            | 6.29            | 24-180                         | SP (1-13)                           | hCyP24              |
| GiCyP21                         | C6LR04     | GS                                | 191                                  | 21.26            | 6.29            | 24-180                         | SP (1-13)                           | hCyP24              |
| GiCyP25                         | V6TEN6     | DH                                | 230                                  | 25.49            | 6.33            | 63-219                         | TMH (31-51)                         | hCyP24              |
| hFKBP12 <sup>1</sup><br>(FKB1A) | P62942     |                                   | 108                                  | 11.95            | 7.89            | 20-108                         |                                     |                     |
| GiFKBP12                        | Q8I6M8     | WB                                | 109                                  | 11.85            | 9.22            | 22-109                         | DR (1-21)                           | hFKBP12             |
| GiFKBP12                        | C6LUS9     | GS                                | 109                                  | 11.85            | 9.26            | 22-109                         | DR (1-21)                           | hFKBP12             |
| GiFKBP13                        | A8B770     | WB                                | 111                                  | 12.56            | 9.52            | 22-110                         |                                     |                     |
| GiFKBP13                        | C6LPP4     | GS                                | 111                                  | 12.61            | 9.34            | 22-110                         |                                     |                     |
| GiFKBP24                        | A8BHU4     | WB                                | 215                                  | 23.85            | 6.30            | 127-215                        | SP (1-15)                           |                     |
| GiFKBP24                        | C6LXS7     | GS                                | 215                                  | 23.93            | 5.72            | 127-215                        | SP 1-15                             |                     |
| GiFKBP28                        | A8BUZ7     | WB                                | 244                                  | 27.80            | 4.68            | 128-225                        | SP (1-18)                           |                     |
| GiFKBP28                        | C6LY30     | GS                                | 244                                  | 27.87            | 4.65            | 128-225                        | SP (1-18)                           |                     |
| GiFKBP29                        | V6TL25     | DH                                | 251                                  | 28.55            | 4.65            | 135-232                        | SP (1-20)                           |                     |
| GiFKBP38                        | A8BAF3     | WB                                | 338                                  | 37.58            | 5.20            | 67-154                         | TPR(168-295)                        | FKB1A               |
| GiFKBP38                        | C6LPE9     | GS                                | 338                                  | 37.68            | 5.20            | 67-154                         | TPR(168-295)                        | FKB1A               |
| GiFKBP39                        | A8BK50     | WB                                | 354                                  | 38.87            | 6.44            | 265-354                        |                                     | FKB1A               |
| GiFKBP39                        | C6M084     | GS                                | 356                                  | 39.02            | 6.35            | 267-356                        | DR(1-22, 217-243)                   |                     |

<sup>1</sup> Human PPlase references. <sup>2</sup>Estimated Molecular weight (kDa) and Isoelectric point (pI) from PPlase sequence. WB: *Giardia* assemblage A isolate WB C6. DH: *Giardia* sub-assemblage A2 isolate DH. GS: *Giardia* assemblage B isolate GS/M clone H7 (GS). <sup>3</sup>Precursor. <sup>4</sup>Mature protein. SP: Signal Peptide. ER: prevents secretion from Endoplasmic Reticulum motif. DR: Disorder Region. TMH: Trans Membrane Helical. TPR Tetratricopeptide repeat motif. All data deposited in the table were obtained from the UniProt database <sup>[40]</sup> (<https://www.uniprot.org/>, Release 2023\_02).
