# Supplementary material for: Insights Into Peptidyl-Prolyl Cis-Trans Isomerases From Clinically Important Protozoans: From Structure to Potential Biotechnological Applications
Source: Preprints.org preprint supplement (doi:10.20944/preprints202406.0718.v1), 2024-06-12
Supplement: Supplementary file 2 [file supplementary]

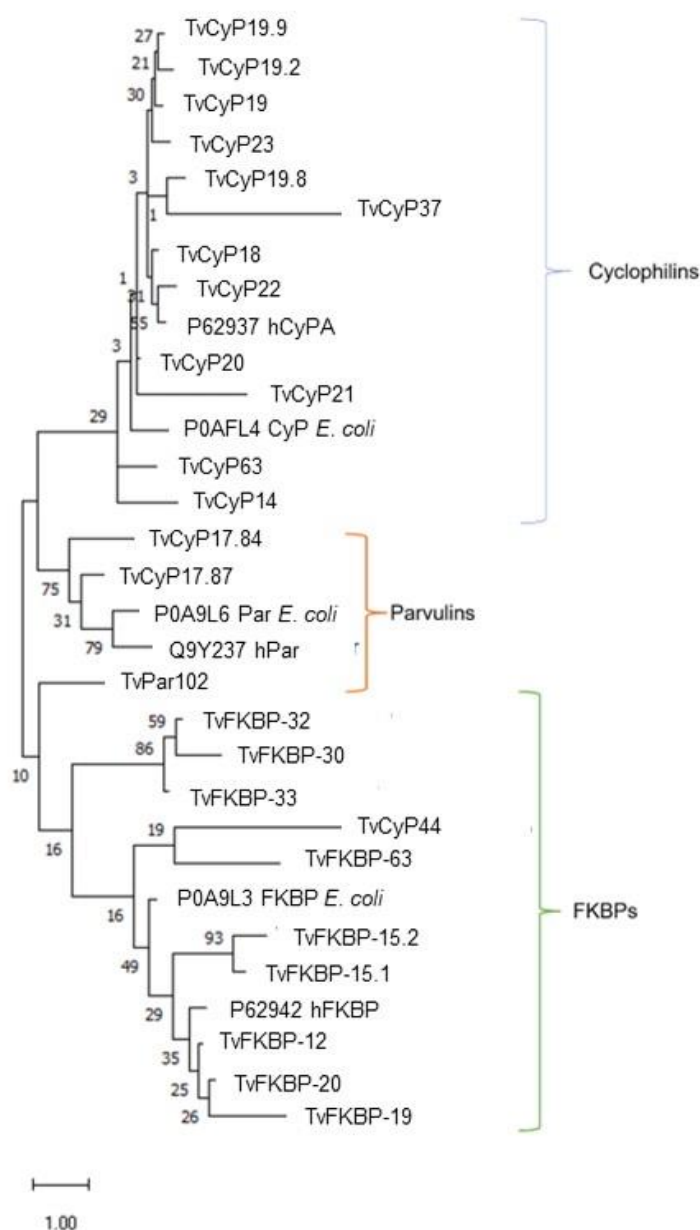

**Figure S1. *T. vaginalis* PPlases phylogenetic tree compared to examples of PPlases from Human and *E. coli*.** Brackets indicate cyclophilin families grouped together. Analysis made with MEGA 11.0<sup>[42]</sup> with a bootstrapping of 1000, using the Maximum Likelihood method and WAG+ G analysis.
