# Supplementary material for: Insights Into Peptidyl-Prolyl Cis-Trans Isomerases From Clinically Important Protozoans: From Structure to Potential Biotechnological Applications
Source: Preprints.org preprint supplement (doi:10.20944/preprints202406.0718.v1), 2024-06-12
Supplement: Supplementary file 3 [file supplementary]

O15729 4 PKVFFDITIG.[2].KAGRIVMELFNDIVPKTAENFRCLCTGE.[ 6].YKGCGFHHRVIKDFMIQGGDFTRHNGTGG 77 *E. histolytica*  
AAQ94596 11 PIVFFDVSIG.[2].EVGRMKIELFADIVPKTAENFRQFCTGE.[ 9].YKGCFFHHRVIKDFMIQGGDFVNGDGTGI 87 Zebrafish  
NP\_610224 17 PVVFFDI AVG.[2].EIGRMIFELFADTVPRTAENFRQFCTGE.[ 9].YKGASFHHRVIKDFMIQGGDFVQGDGTGV 93 Fruit fly  
B53522 179 PRVFFDISID.[2].PAGRIEFELFADVVPKTAENFRALCTGE.[11].YKGCFFHRIIPQFMCQGGDFTRMNGTGG 257 *T. gondii*  
AAR11779 4 PRVFFDVTAN.[2].PVGRIMMELRGDVVPKTAENFRALCTGE.[ 4].YKGSPPFHRVIPSFMCQGGDFTRQNGTGG 75 *C. farreri*  
AAC05639 4 PIVFFDITAD.[2].PVGRIEMELYADDVPKTAENFRALCTGE.[11].FKGSTFHRVIPNFMCQGGDFTRNGTGG 82 *C. reinhardtii*  
EAA42921 7 DKVFFDITIG.[2].PLGRITMGLFGSIVPKTAENFKKLCTGE.[ 4].YKGSTFHRVIPKFMQGGDFTNHNGTGG 78 *G. lamblia*  
1AK4\_A 4 PTVFFDIAVD.[2].PLGRVSFELFADKVPKTAENFRALSTGE.[ 4].YKGSCHFRIIPGFMCQGGDFTRHNGTGG 75 Human  
CAE76450 12 PLVFFDITLG.[2].PLGRITFELFKDVVPKTAENFRQFCTGE.[10].YKGSKFHRIIPFMCQGGDFLNGDGTGS 89 *N. crassa*

O15729 78 KSIYGTKEADEAFTVKH.[1].KPGMLSMANAGPNTNGSQFFITITVPCPWL DKGHVVFVGQVVEGYDVVKMIENN 147 *E. histolytica*  
AAQ94596 88 CSIYRGFFADENFRMKH.[1].GPGLLSMANSGPNTNGSQFFITCTKCDWLDKGHVVFVGKVVDGLLMRKIENV 157 Zebrafish  
NP\_610224 94 TSIYGNTFGDENFTLKH.[1].SPGLLSMANSGKETNGSQFFITCAKNFLDKGHVVFGRVLDGLLMRKIENV 163 Fruit fly  
B53522 258 ESIYGEKFADENFSYKH.[1].EPFLLSMANAGPNTNGSQFFITITVPCPWL DKGHVVFVGKVVAQGEVVKMMEAE 327 *T. gondii*  
AAR11779 76 KSIYGEKFADENFTLKH.[1].GPGVLSMANAGPNTNGSQFFLCTARTEWLDKGHVVFVGSGMDVVKKIESY 145 *C. farreri*  
AAC05639 83 ESIYGEKFADENFKHRH.[1].GPGVLSMANAGPNTNGSQFFLCTVETAWLDKGHVVFVGKVCKGMDVVKVKEGY 152 *C. reinhardtii*  
EAA42921 79 KSIYGAKEPDENFEIKH FVGCLSMANAGPNTNGSQFFLTVADTAWLDKGHVVFGRVLDGMDVVKAIETT 147 *G. lamblia*  
1AK4\_A 76 KSIYGEKFEDENFILKH.[1].GPGILSMANAGPNTNGSQFFICTAKTEWLDKGHVVFVGKVKEGMNIVEAMERF 145 Human  
CAE76450 90 .[1].CIYGTKEFADENFILKH.[1].TPGLLSMANAGPNTNGSQFFITITVPTPFLDKGHVVFVGKVVDGMDVVKKMENT 160 *N. crassa*

O15729 148 .[7].PKKAVVIADCG 165 *E. histolytica*  
AAQ94596 158 .[7].PKLPVVVSQCG 175 Zebrafish  
NP\_610224 164 .[7].PKLPVTISQCG 181 Fruit fly  
B53522 328 .[6].PKCAVEISSCG 344 *T. gondii*  
AAR11779 146 .[6].TSEKIIVADCG 162 *C. farreri*  
AAC05639 153 .[6].TRATFAIADCA 169 *C. reinhardtii*  
EAA42921 148 .[7].PVEKVVVADCG 165 *G. lamblia*  
1AK4\_A 146 .[6].TSKKITIADCG 162 Human  
CAE76450 161 .[9].PNLDVVVIAQCG 180 *N. crassa*

**Figure S3. Sequence alignment for the most similar members of the PPIase CyP-type and the 18 kDa CyP from *Entamoeba histolytica*.** All proteins are identified with NCBI Accession number, and the alignment was carried out in CDD data base [45]. Amino acids in the active site are in yellow boxes and conserved residues are in gray boxes.
