# Supplementary material for: Insights Into Peptidyl-Prolyl Cis-Trans Isomerases From Clinically Important Protozoans: From Structure to Potential Biotechnological Applications
Source: Preprints.org preprint supplement (doi:10.20944/preprints202406.0718.v1), 2024-06-12
Supplement: Supplementary file 4 [file supplementary]

Table S3. Percent identity matrix for *G. intestinalis* PPIases.

| PPIase name | UniProt      | Isolate | Percent Identity Matrix |       |       |       |       |       |       |       |       |       |       |       |       |       |       |       |       |       |       |       |       |
|-------------|--------------|---------|-------------------------|-------|-------|-------|-------|-------|-------|-------|-------|-------|-------|-------|-------|-------|-------|-------|-------|-------|-------|-------|-------|
| GiCyP21     | C6LR04       | GS      | 100                     | 94.24 | 94.24 | 51.31 | 47.56 | 54.17 | 54.17 | 16.09 | 16.09 | 16.09 | 16.33 | 13.61 | 23.81 | 22.62 | 15.97 | 14.58 | 15.71 | 15    | 25    | 20.25 | 20.25 |
| GiCyP25     | V6TEN6       | DH      | 94.24                   | 100   | 100   | 48.58 | 46.95 | 53.57 | 53.57 | 16.09 | 17.32 | 16.67 | 20.43 | 18.28 | 23.81 | 22.62 | 16.67 | 15.28 | 17.86 | 16.43 | 26.25 | 21.52 | 21.52 |
| GiCyP21     | A8BJP8       | WB      | 94.24                   | 100   | 100   | 50.79 | 46.95 | 53.57 | 53.57 | 16.09 | 16.67 | 16.67 | 17.69 | 14.97 | 23.81 | 22.62 | 16.67 | 15.28 | 17.86 | 16.43 | 26.25 | 21.52 | 21.52 |
| hCYPS1      | P23284PPIB   | HUMAN   | 51.31                   | 48.58 | 50.79 | 100   | 63.64 | 62.5  | 63.1  | 14.61 | 14.75 | 14.04 | 19.3  | 17.54 | 18.82 | 16.47 | 14.38 | 13.01 | 18.88 | 18.88 | 23.46 | 23.75 | 23.75 |
| hCyPA       | P62937 PPIA  | HUMAN   | 47.56                   | 46.95 | 46.95 | 63.64 | 100   | 66.46 | 65.85 | 12.99 | 12.34 | 12.34 | 14.62 | 13.85 | 16.67 | 14.29 | 12.59 | 12.59 | 13.28 | 11.72 | 18.75 | 18.75 | 18.75 |
| GiCyP18     | C6LQJ1       | GS      | 54.17                   | 53.57 | 53.57 | 62.5  | 66.46 | 100   | 99.4  | 14.01 | 13.38 | 13.38 | 15.04 | 13.53 | 17.86 | 15.48 | 14.81 | 14.81 | 15.5  | 13.95 | 20    | 20.25 | 20.25 |
| GiCyP18     | A8BC67       | WB      | 54.17                   | 53.57 | 53.57 | 63.1  | 65.85 | 99.4  | 100   | 14.01 | 13.38 | 13.38 | 15.79 | 14.29 | 17.86 | 15.48 | 14.81 | 14.81 | 14.73 | 13.95 | 20    | 20.25 | 20.25 |
| GiFKBP28    | C6LY30       | GS      | 16.09                   | 16.09 | 16.09 | 14.61 | 12.99 | 14.01 | 14.01 | 100   | 79.1  | 79.1  | 17.87 | 17.39 | 20    | 20    | 21.25 | 20.62 | 23.16 | 21.05 | 21.78 | 29    | 30    |
| GiFKBP29    | V6TL25       | DH      | 16.09                   | 17.32 | 16.67 | 14.75 | 12.34 | 13.38 | 13.38 | 79.1  | 100   | 100   | 14.95 | 14.95 | 21.9  | 20.95 | 18.12 | 17.5  | 21.58 | 19.47 | 19.8  | 27    | 27    |
| GiFKBP28    | A8BUZ7       | WB      | 16.09                   | 16.67 | 16.67 | 14.04 | 12.34 | 13.38 | 13.38 | 79.1  | 100   | 100   | 14.01 | 14.01 | 21.9  | 20.95 | 18.12 | 17.5  | 21.58 | 19.47 | 19.8  | 27    | 27    |
| GiFKBP39    | C6M084       | GS      | 16.33                   | 20.43 | 17.69 | 19.3  | 14.62 | 15.04 | 15.79 | 17.87 | 14.95 | 14.01 | 100   | 86.44 | 26.67 | 25.71 | 30.87 | 30.87 | 24.88 | 24.88 | 39.62 | 38.32 | 38.32 |
| GiFKBP39    | A8BK50       | WB      | 13.61                   | 18.28 | 14.97 | 17.54 | 13.85 | 13.53 | 14.29 | 17.39 | 14.95 | 14.01 | 86.44 | 100   | 25.71 | 26.67 | 28.86 | 28.86 | 25.94 | 25.47 | 38.68 | 37.38 | 37.38 |
| GiFKBP13    | C6LPP4       | GS      | 23.81                   | 23.81 | 23.81 | 18.82 | 16.67 | 17.86 | 17.86 | 20    | 21.9  | 21.9  | 26.67 | 25.71 | 100   | 91.89 | 30    | 29.09 | 33.02 | 33.96 | 37.38 | 38.68 | 39.62 |
| GiFKBP13    | A8B770       | WB      | 22.62                   | 22.62 | 22.62 | 16.47 | 14.29 | 15.48 | 15.48 | 20    | 20.95 | 20.95 | 25.71 | 26.67 | 91.89 | 100   | 30    | 29.09 | 35.85 | 34.91 | 36.45 | 38.68 | 39.62 |
| GiFKBP38    | C6LPE9       | GS      | 15.97                   | 16.67 | 16.67 | 14.38 | 12.59 | 14.81 | 14.81 | 21.25 | 18.12 | 18.12 | 30.87 | 28.86 | 30    | 30    | 100   | 94.97 | 32.67 | 31.33 | 48.6  | 48.15 | 48.15 |
| GiFKBP38    | A8BAF3       | WB      | 14.58                   | 15.28 | 15.28 | 13.01 | 12.59 | 14.81 | 14.81 | 20.62 | 17.5  | 17.5  | 30.87 | 28.86 | 29.09 | 29.09 | 94.97 | 100   | 32    | 31.33 | 48.6  | 47.22 | 47.22 |
| GiFKBP24    | C6LXS7       | GS      | 15.71                   | 17.86 | 17.86 | 18.88 | 13.28 | 15.5  | 14.73 | 23.16 | 21.58 | 21.58 | 24.88 | 25.94 | 33.02 | 35.85 | 32.67 | 32    | 100   | 84.19 | 42.06 | 47.22 | 48.15 |
| GiFKBP24    | A8BHU4       | WB      | 15                      | 16.43 | 16.43 | 18.88 | 11.72 | 13.95 | 13.95 | 21.05 | 19.47 | 19.47 | 24.88 | 25.47 | 33.96 | 34.91 | 31.33 | 31.33 | 84.19 | 100   | 41.12 | 47.22 | 48.15 |
| FKBP-12     | P62942 FKB1A | HUMAN   | 25                      | 26.25 | 26.25 | 23.46 | 18.75 | 20    | 20    | 21.78 | 19.8  | 19.8  | 39.62 | 38.68 | 37.38 | 36.45 | 48.6  | 48.6  | 42.06 | 41.12 | 100   | 54.21 | 52.34 |
| GiFKBP12    | C6LUS9       | GS      | 20.25                   | 21.52 | 21.52 | 23.75 | 18.75 | 20.25 | 20.25 | 29    | 27    | 27    | 38.32 | 37.38 | 38.68 | 38.68 | 48.15 | 47.22 | 47.22 | 47.22 | 54.21 | 100   | 97.25 |
| GiFKBP12    | Q8I6M8       | WB      | 20.25                   | 21.52 | 21.52 | 23.75 | 18.75 | 20.25 | 20.25 | 30    | 27    | 27    | 38.32 | 37.38 | 39.62 | 39.62 | 48.15 | 47.22 | 48.15 | 48.15 | 52.34 | 97.25 | 100   |

GS: *Giardia* assemblage B isolate GS/M clone H7 (GS). DH: *Giardia* sub-assemblage A2 isolate DH. WB: *Giardia* assemblage A isolate WB C6. PPIA and PPIB are hCyPA and hCyPB, respectively. FKB1A is hFKBP-12. The Percent Identity Matrix was performed on the UniProt database [40] (<https://www.uniprot.org/>, Release 2023\_02) and created using Clustal 2 [64].

|     |       |       |       |       |       |       |       |       |       |     |   |
|-----|-------|-------|-------|-------|-------|-------|-------|-------|-------|-----|---|
| 100 | 99-95 | 94-90 | 89-80 | 79-70 | 69-60 | 59-50 | 49-40 | 39-30 | 29-20 | <19 | % |
|-----|-------|-------|-------|-------|-------|-------|-------|-------|-------|-----|---|
