# Supplementary material for: Insights Into Peptidyl-Prolyl Cis-Trans Isomerases From Clinically Important Protozoans: From Structure to Potential Biotechnological Applications
Source: Preprints.org preprint supplement (doi:10.20944/preprints202406.0718.v1), 2024-06-12
Supplement: Supplementary file 5 [file supplementary]

**Table S5. Comparison of PPlase sequences between *P. falciparum* and *P. vivax*.**

| <i>P. falciparum</i> |                |      |                                      |     | <i>P. vivax</i>      |                |      |                                      |     | Identity <sup>2</sup><br>(%) | Similarity <sup>2</sup><br>(%) |
|----------------------|----------------|------|--------------------------------------|-----|----------------------|----------------|------|--------------------------------------|-----|------------------------------|--------------------------------|
| Name                 | Length<br>(aa) | kDa  | PPlase domain<br>Region <sup>1</sup> | aa  | Name                 | Length<br>(aa) | kDa  | PPlase domain<br><sup>b</sup> Region | aa  |                              |                                |
| PfCyP18.6            | 167            | 18.6 | 6-154                                | 148 | PvCyP18.4            | 167            | 18.4 | 6-154                                | 148 | 88.6                         | 98.2                           |
| PfCyP19              | 171            | 19   | 8-170                                | 162 | PvCyP19              | 170            | 19   | 7-169                                | 162 | 88.9                         | 94.7                           |
| PfCyP22 <sup>3</sup> | 195            | 22   | 32-192                               | 160 | PvCyP21 <sup>3</sup> | 193            | 21   | 32-192                               | 160 | 79.0                         | 89.2                           |
| PfCyP23              | 204            | 23   | 53-199                               | 146 | PvCyP23              | 203            | 23   | 52-198                               | 146 | 85.3                         | 92.6                           |
| PfCyP25              | 217            | 24.9 | 51-216                               | 165 | PvCyP29              | 262            | 29   | 96-261                               | 165 | 66.8                         | 73.6                           |
| PfCyP26              | 226            | 26   | 9-173                                | 162 | PvCyP26              | 226            | 26   | 9-173                                | 162 | 87.6                         | 94.7                           |
| PfCyP32              | 280            | 32   | 65-223                               | 158 | PvCyP32              | 276            | 32   | 65-223                               | 158 | 80.0                         | 89.6                           |
| PfCyP53              | 446            | 52.6 | 19-161                               | 142 | PvCyP52              | 456            | 52   | 19-160                               | 141 | 55.4                         | 68.7                           |
| PfCyP72              | 609            | 72.5 | 333-526                              | 193 | PvCyP71              | 616            | 71   | 322-508                              | 186 | 59.0                         | 74.1                           |
| PfCyP81              | 677            | 81   | 8-217                                | 209 | PvCyP65              | 590            | 65   | 8-194                                | 186 | 37.8                         | 54.5                           |
| PfCyP87              | 747            | 87   | 599-745                              | 146 | PvCyP83              | 737            | 83   | 589-735                              | 146 | 66.4                         | 78.3                           |
| PfFKBP-25            | 213            | 25.6 | 100-185                              | 85  | PvFKBP-25            | 215            | 25   | 102-187                              | 85  | 60.0                         | 78.2                           |
| PfFKBP-35            | 304            | 35   | 37-126                               | 89  | PvFKBP-34            | 302            | 34   | 36-125                               | 89  | 79.7                         | 90.5                           |

<sup>1</sup> The numbers in each region indicate the starting and ending amino acid position of the PPlase domain. <sup>2</sup> The percentage of identity and similarity were obtained by comparing the amino acid sequences of *P. falciparum* PPlases with the *P. vivax* PPlases using the EMBOSS Needle tool from EMBL-EBI (<https://www.ebi.ac.uk/services>) [42]. <sup>3</sup> Proteins, PfCyP22 and PvCyP21 were considered precursors, i.e., uncleaved signal peptide. All data deposited in the table were obtained from the UniProt database [40] (<https://www.uniprot.org/>, Release 2023\_02).
