# Supplementary material for: Insights Into Peptidyl-Prolyl Cis-Trans Isomerases From Clinically Important Protozoans: From Structure to Potential Biotechnological Applications
Source: Preprints.org preprint supplement (doi:10.20944/preprints202406.0718.v1), 2024-06-12
Supplement: Supplementary file 7 [file supplementary]

**Table S4. Percentage identity among PPlase sequences of *L. major* and *L. donovani*<sup>1</sup>.**

| <i>L. major</i> PPlase | kDa   | <i>L. donovani</i> PPlase | kDa   | Percentage Identity |
|------------------------|-------|---------------------------|-------|---------------------|
| LmCyP19                | 18.8  | LdCyP19                   | 18.8  | 96.0                |
| LmCyP20.3              | 20.3  | LdCyP20.3                 | 20.34 | 88.5                |
| LmCyP23                | 23.0  | LdCyP20.4                 | 20.4  | 82.9                |
| LmCyP24                | 24.0  | LdCyP24                   | 24.5  | 83.3                |
| LmCyP24.6              | 24.6  | LdCyP25                   | 25.2  | 98.7                |
| LmCyP25                | 25.2  | LdCyP26                   | 25.5  | 98.7                |
| LmCyP26                | 25.5  | LdCyP27                   | 26.6  | 93.9                |
| LmCyP26.5              | 26.4  | LdCyP28                   | 27.5  | 93.0                |
| LmCyP27                | 27.5  | LdCyP28.6                 | 28.6  | 98.4                |
| LmCyP29                | 28.8  | LdCyP29                   | 28.8  | 93.2                |
| LmCyP32                | 31.4  | LdCyP32                   | 31.9  | 91.2                |
| LaCyP36                | 36.1  | LdCyP36                   | 36.09 | 93.7                |
| LmCyP38                | 38.4  | LdCyP38.4                 | 38.4  | 96.0                |
| LmCyP39                | 38.6  | LdCyP39                   | 38.7  | 94.0                |
| LmCyP48                | 48.5  | LdCyP48.5                 | 48.5  | 94.0                |
| LmCyP49                | 49.0  | LdCyP49                   | 48.8  | 87.4                |
| LmCyP108               | 108.1 | LdCyP108                  | 108.3 | 93.8                |
| LmFKBP11.8             | 11.8  | LdFKBP11.8                | 11.8  | 98.2                |
| LmFKBP11.9             | 11.9  | LdFKBP11.9                | 11.9  | 96.3                |
| LmFKBP17.3             | 17.2  | LdFKBP17                  | 17.3  | 93.7                |
| LmFKBP23               | 22.8  | LdFKBP22                  | 22.7  | 96.5                |
| LmFKBP48               | 47.6  | LdFKBP47                  | 47.8  | 96.1                |
| LmPar13                | 12.5  | LdPar12                   | 12.6  | 93.9                |
| LmPar47                | 46.5  | LdPar17                   | 17.4  | 34.3                |

<sup>1</sup>The percentage of identity was obtained by comparing the amino acid sequences of *L. major* PPlases with the *L. donovani* PPlases using the EMBOSS Needle tool from EMBL-EBI [42] (<https://www.ebi.ac.uk/services>). The molecular weight (kDa) and amino acids sequence were obtained from the UniProt database [40] (<https://www.uniprot.org/>, Release 2023\_02).
