# Supplementary material for: Insights Into Peptidyl-Prolyl Cis-Trans Isomerases From Clinically Important Protozoans: From Structure to Potential Biotechnological Applications
Source: Preprints.org preprint supplement (doi:10.20944/preprints202406.0718.v1), 2024-06-12
Supplement: Supplementary file 8 [file supplementary]

**Table S1. Sequence identities of *T. vaginalis* PPlases**

| Reference PPlasa  | PPlase     | UniProt | Percentage of Identity |
|-------------------|------------|---------|------------------------|
| <b>TvCyP19</b>    | TvCyP14    | A2FJP1  | 19.0                   |
|                   | TvCyP18    | A2EC21  | 71.7                   |
|                   | TvCyP19    | A2DT06  | 100.0                  |
|                   | TvCyP19.2  | A2F1H0  | 58.0                   |
|                   | TvCyP19.8  | A2FAA8  | 44.0                   |
|                   | TvCyP19.9  | A2DLL4  | 64.0                   |
|                   | TvCyP20    | A2E5J4  | 53.7                   |
|                   | TvCyP21    | A2FIV3  | 19.5                   |
|                   | TvCyP22    | A2DKZ9  | 47.5                   |
|                   | TvCyP23    | A2FTU8  | 56.7                   |
|                   | TvCyP37    | A2E6H3  | 10.7                   |
|                   | TvCyP44    | A2GDG2  | 11.0                   |
|                   | TvCyP63    | A2DEW6  | 10.0                   |
| <b>TvFKBP12</b>   | TvFKBP12   | A2DA37  | 100.0                  |
|                   | TvFKBP15.1 | A2DYS7  | 19.4                   |
|                   | TvFKBP15.2 | A2G763  | 16.7                   |
|                   | TvFKBP19   | A2FYT1  | 18.2                   |
|                   | TvFKBP20   | A2F0D0  | 37.2                   |
|                   | TvFKBP30   | A2EV02  | 24.8                   |
|                   | TvFKBP32   | A2EC50  | 16.3                   |
|                   | TvFKBP33   | A2G9L9  | 14.8                   |
|                   | TvFKBP63   | A2FER9  | 6.6                    |
| <b>TvPar17.84</b> | TvPar17.84 | A2ECU0  | 100.0                  |
|                   | TvPar17.87 | A2ED59  | 41.6                   |
|                   | TvPar102   | A2EWG2  | 5.3                    |

Complete sequence alignment analysis of PPlases from *T. vaginalis* was run with the ClustalW2 tool embedded in EMBOSS-Needle [42]. CyPs were aligned with TvCyP19, FKBP's were aligned with TvFKBP-12, and Pars were aligned with TvPar17.84. The sequences were retrieved from the UniProt database [40] (<https://www.uniprot.org/>, Release 2023\_02)
